# Supplementary material for: Knowledge Management in EURAD: the Roadmap
Source: Copernicus journal article supplement (doi:10.5194/sand-1-243-2021), 2021-11-10
Supplement: Supplementary file 1 [file sand-1-243-2021-supplement.pdf]

Supplement of Saf. Nucl. Waste Disposal, 1, 243–244, 2021  
<https://doi.org/10.5194/sand-1-243-2021-supplement>  
© Author(s) 2021. CC BY 4.0 License.

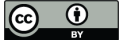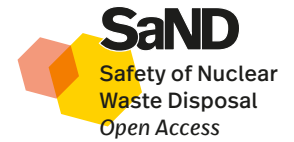

*Supplement of*

## **Knowledge Management in EURAD: the Roadmap**

**Tara Beattie et al.**

*Correspondence to:* Piet Zuidema ([piet.zuidema@zuidema-consult.ch](mailto:piet.zuidema@zuidema-consult.ch))

The copyright of individual parts of the supplement might differ from the article licence.

BASE Interdisciplinary Research Symposium, Session 4B, 10th November 2021

# **Knowledge Management in EURAD:** Introduction and information on Roadmap

Piet Zuidema, Chief Scientific Officer

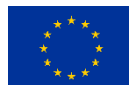

*This project has received funding from the European Union's Horizon 2020 research and innovation programme 2014-2018 under grant agreement N°847593*

# EURAD – European Joint Programme on Radioactive Waste Management

Ministries from **23 European countries** (20 Member-States, 3 Associated Countries), recognising their role of directing RD&D at the national level, provided mandates to **51 organisations** acting as **Beneficiary** within EURAD:

- Waste Management Organisations (**WMO**)
- Technical Support Organisations (**TSO**)
- Research Entities (**RE**)

... with **61 linked third parties** & **3 international partners** also participating

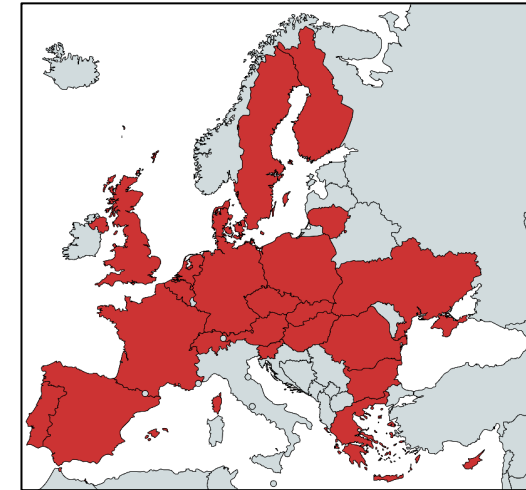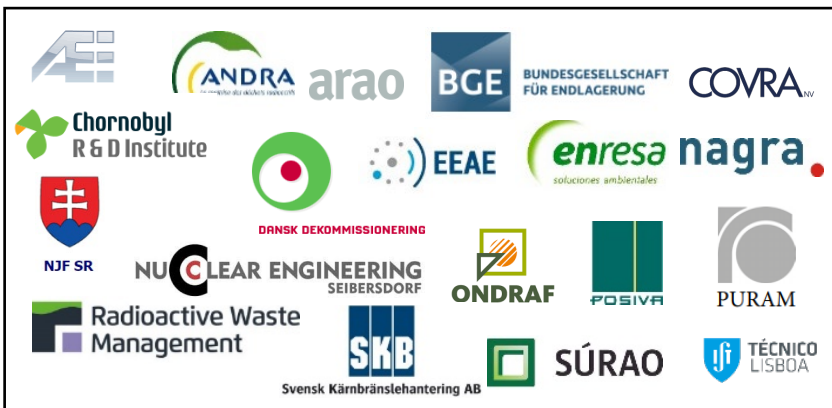

**19 Waste Management Organisations** *Whose mission covers the management and disposal of radioactive waste*

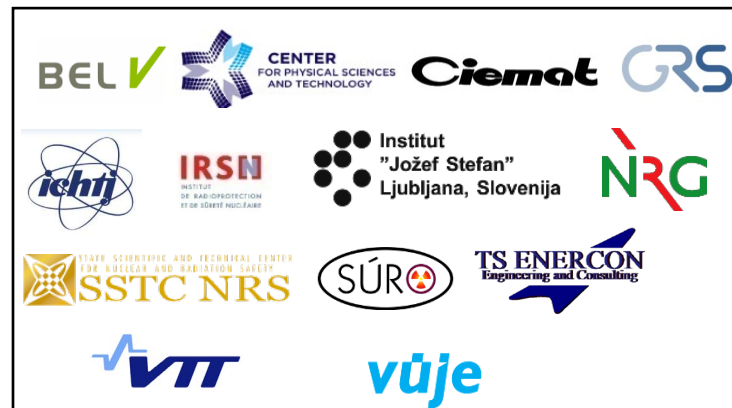

**13 regulatory Technical Support Organisations** *Providing S/T basis for supporting regulators' decisions*

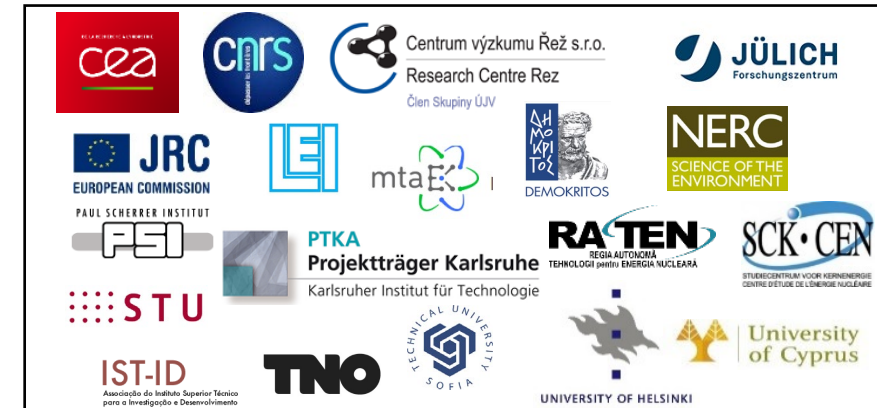

**19 nationally funded Research Entities** *Working on the RWM challenges under the responsibility of MS*

## The EURAD Vision – addressed in all EURAD activities

*Provide added value to member states in their timely implementation of radioactive waste management activities*

*A **step change** in **European collaboration** towards **safe radioactive waste management**, including disposal, through the **development** of a **robust and sustained science, technology and knowledge management programme** that supports **timely implementation of RWM activities** and serves to **foster mutual understanding and trust** between Joint Programme participants.*

## The EURAD Vision – addressed in all EURAD activities

*Provide added value to member states in their timely*

- **EURAD** contributes to the **member states programme** to **timely implement disposal solutions** that are ...
  - safe
  - based on sound science
  - societally acceptable
- .. **with the EURAD-platform** that ...
  - deepens **research cooperation** to deliver **cutting-edge science**
  - increases **mutual understanding and trust** between the participants
  - provides a knowledge management programme that **makes existing knowledge easily available, gives guidance and provides training ...**
    - to allow early stage programmes to take full advantage of existing knowledge
    - to help advanced programmes to maintain the knowledge needed

*A step  
manag  
sustain  
support  
unders*

*ist and  
that  
tutual*

## EURAD Objectives

- Implement a robust and sustained state-of-the-art **Science and Technology Programme**
- Identify and elaborate upon complex issues by bringing together interested actors to jointly conduct **Strategic Studies**
- Consolidate efforts across Member-States, organisations and generations on **Knowledge Management**
- Foster **Mutual Understanding** and **Trust** between participants (incl. from Civil Society) and other stakeholders

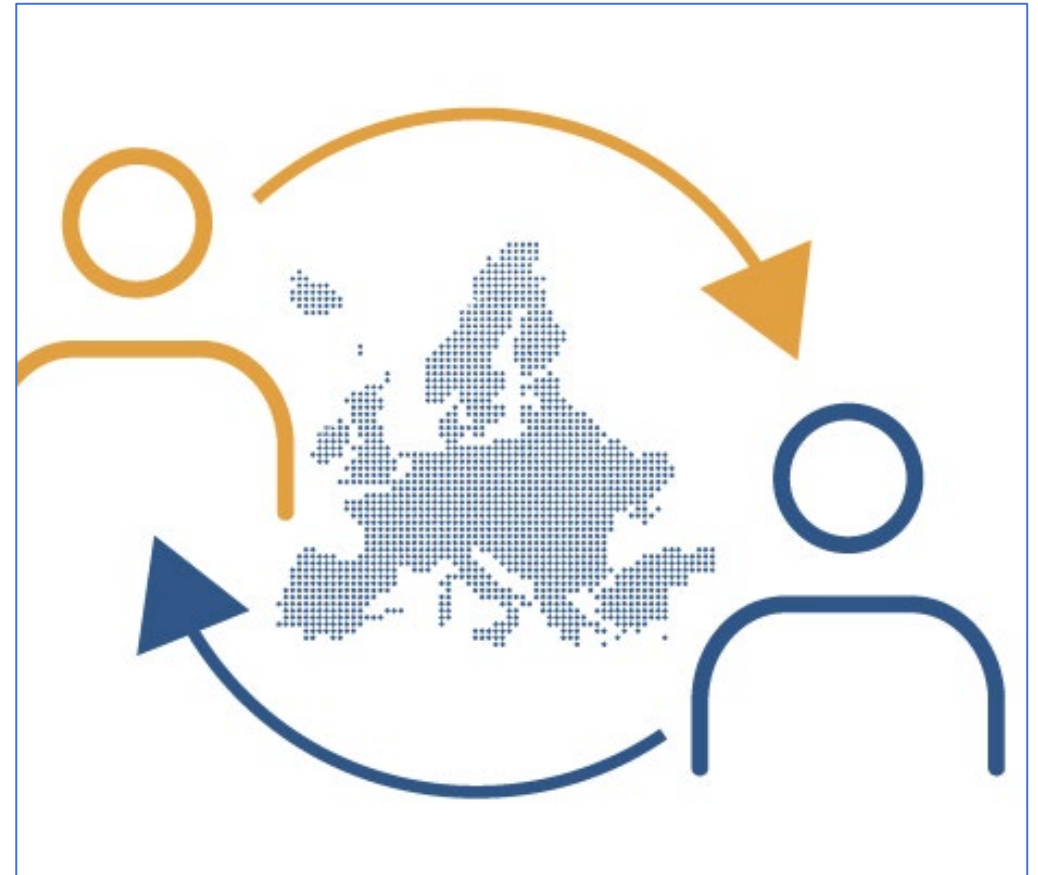

## EURAD Objectives

- Implement a robust and sustained state-of-the-art **Science and Technology Programme**
- Identify and elaborate upon complex issues by bringing together interested actors to jointly conduct **Strategic Studies**
- Consolidate efforts across Member-States, organisations and generations on **Knowledge Management**
- Foster **Mutual Understanding** and **Trust** between participants (incl. from Civil Society) and other stakeholders

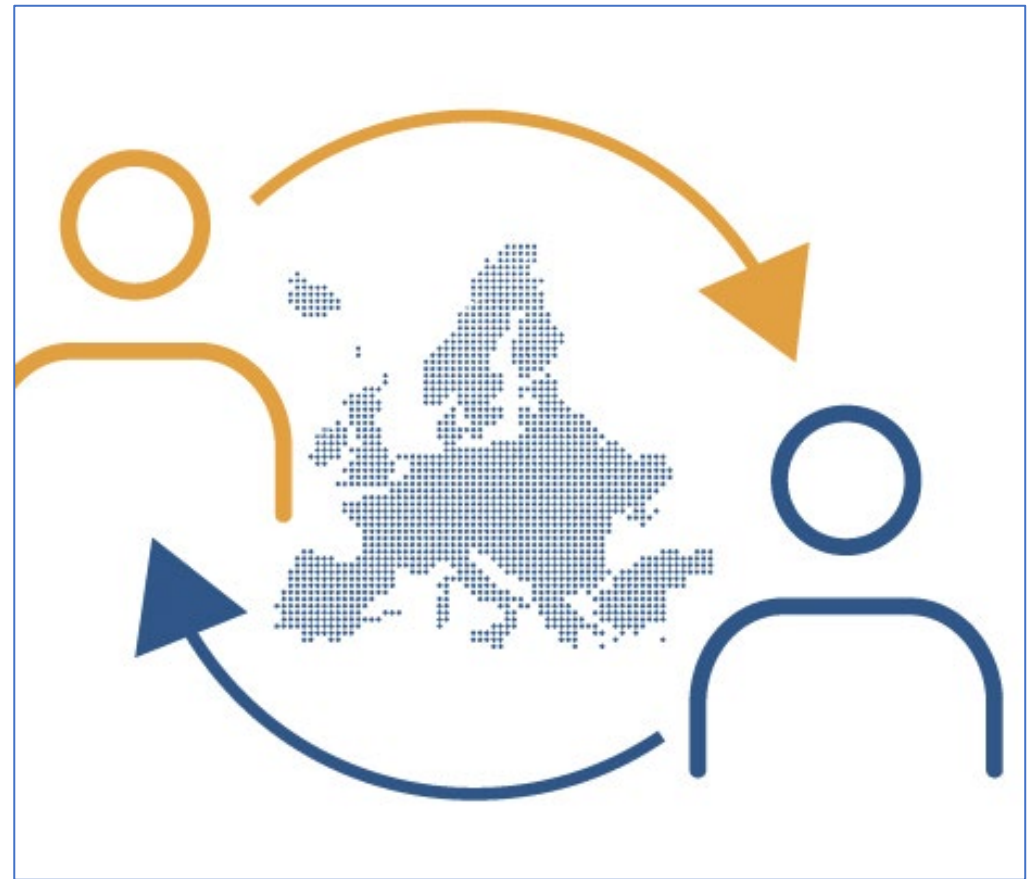

# EURAD Knowledge Management & Networking Programme

- 1 Roadmap**  
A common framework to structure knowledge
- 2 State of Knowledge**  
What we know and why it is important
- 3 Guidance**  
Best practice and lessons learned
- 4 Mobility & Training**  
Transfer of experience and know-how
- 5 Networking & Tools**  
Connecting people to people, and people to content

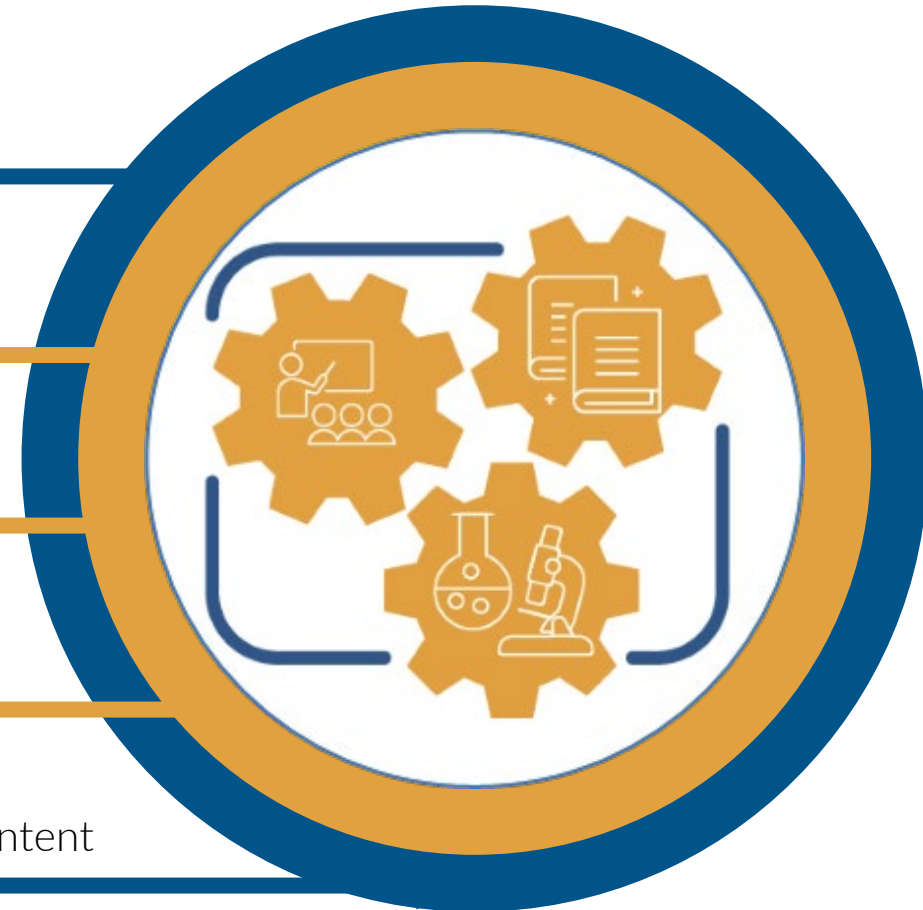



# EURAD Knowledge Management & Networking Programme

1 ... with presentations on these activities in this session by

- 2 • Piet Zuidema (me) on the **Roadmap providing 'Structure & Context' for Knowledge Management** (... and other activities, e.g. planning)
- 3 • Astrid Göbel on developing the **State-of-Knowledge** and **Guidance** as essential parts of the Knowledge Management Programme
- 4 • Niels Belmans on the **EURAD School of Radioactive Waste Management** to support the community in knowledge transfer and networking
- 5 • Julien Dewoghelaere on the **Interactions of RD+D / Strategic Study Projects with Civil Society** to learn about fruitful interactions

connecting people to people, and people to content

# EURAD Roadmap – geological disposal as example

A generic representation of goals, activities, and knowledge needed, from waste generation to disposal

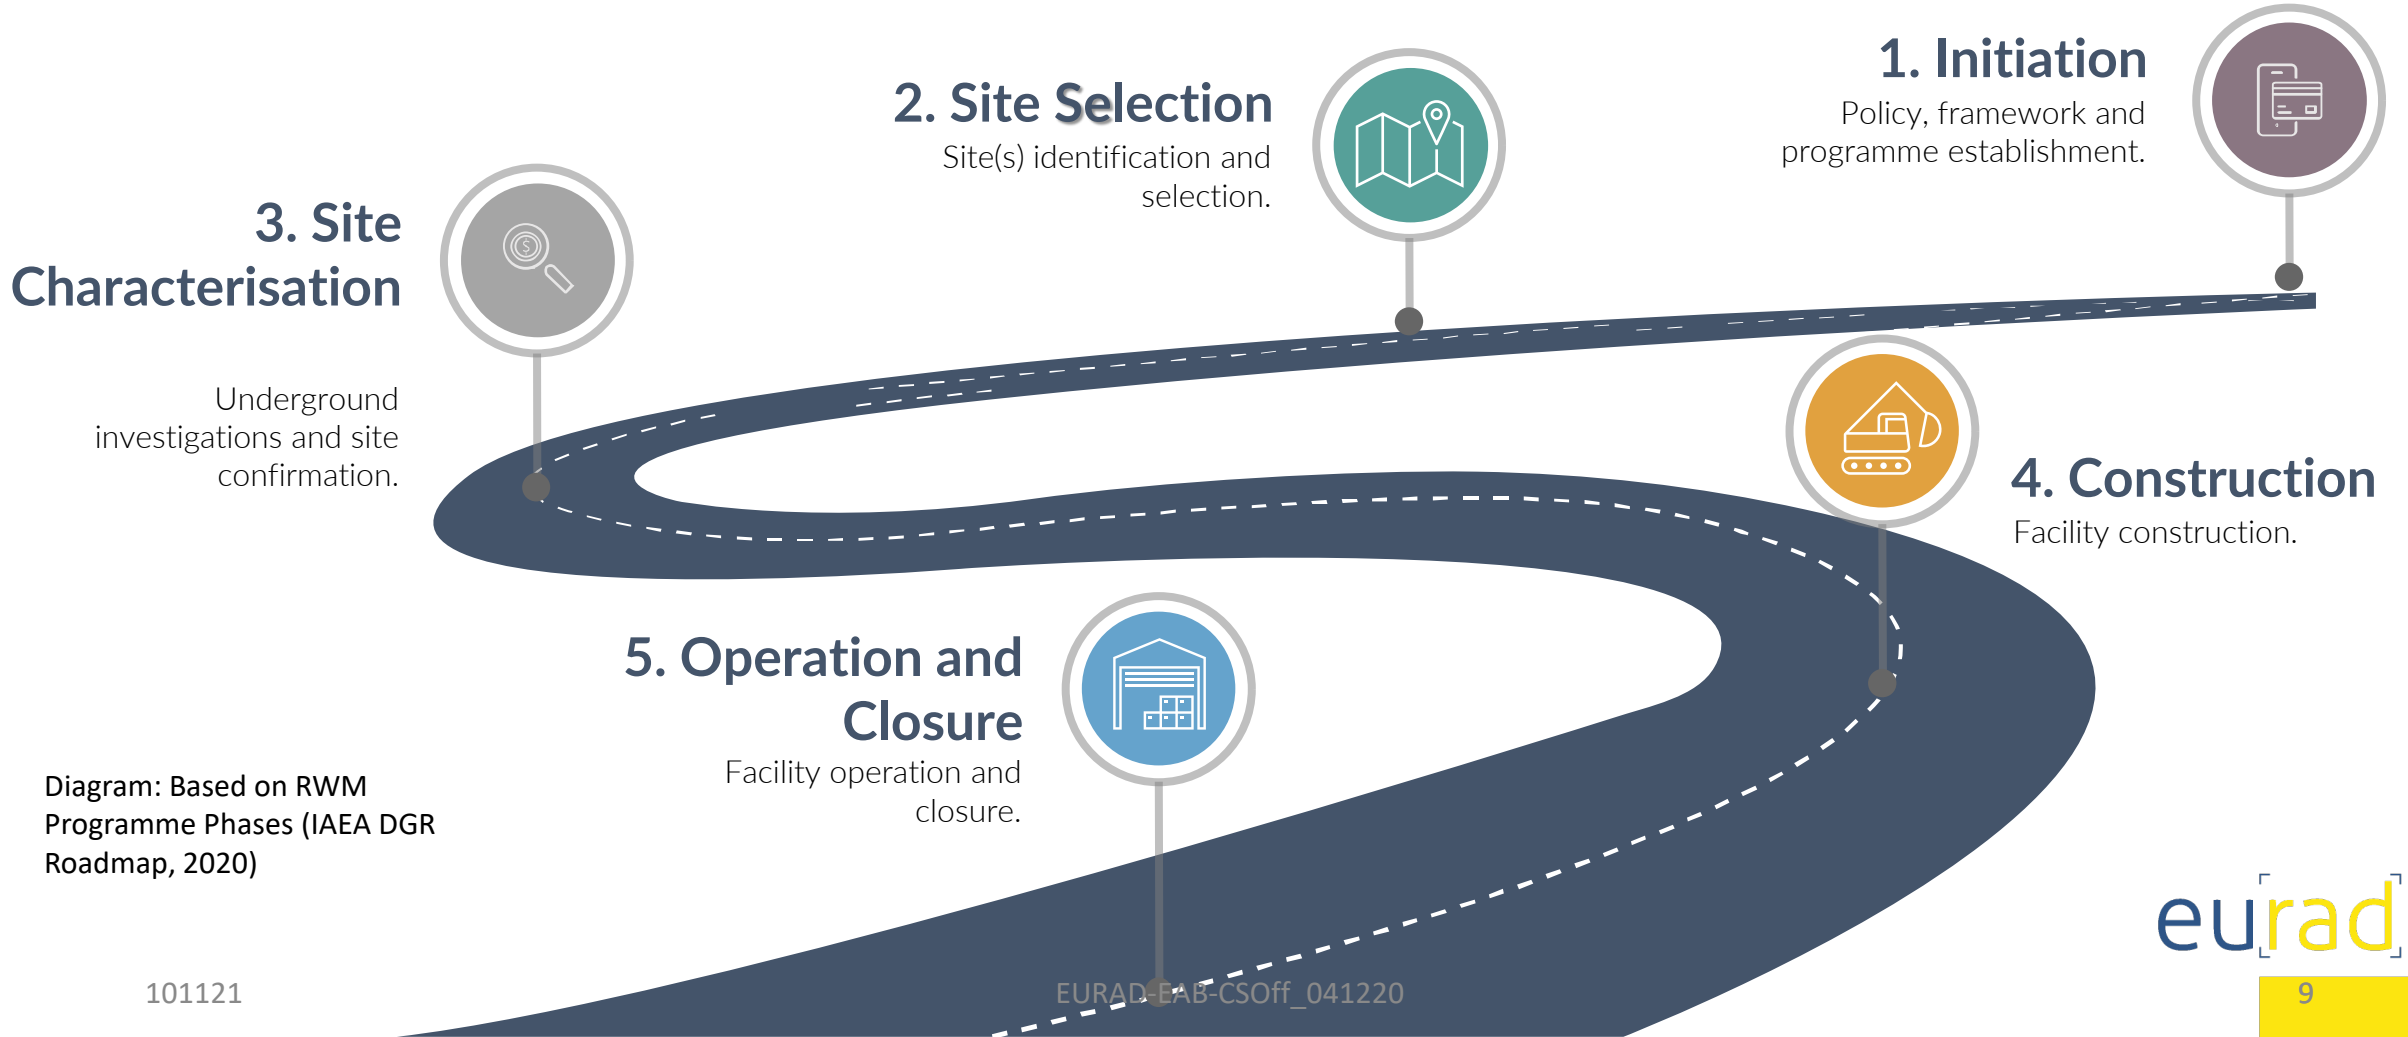

Diagram: Based on RWM Programme Phases (IAEA DGR Roadmap, 2020)

# Scope of EURAD Roadmap (for geological disposal)

Thematic goals breakdown structure (GBS) covering all RWM activities needed for implementation

1. Programme Management
2. Pre-Disposal
3. Engineered Barrier Systems
4. Geoscience
5. Design & Optimisation
6. Siting & Licensing
7. Safety Case

**Hierarchical breakdown: 7 Themes > 20 Sub-themes > ~ 70 Domains**

A framework based on **goal-oriented breakdown** ...

- to **transfer** existing information & knowledge
- to **assess** existing information & knowledge
- to **identify** needs for **additional RD&D** (→ SRA)
- to **identify** issues to be **collectively explored**
- to **help** achieving clarity on **scope definition**

# EURAD Knowledge Management: Example for structures used

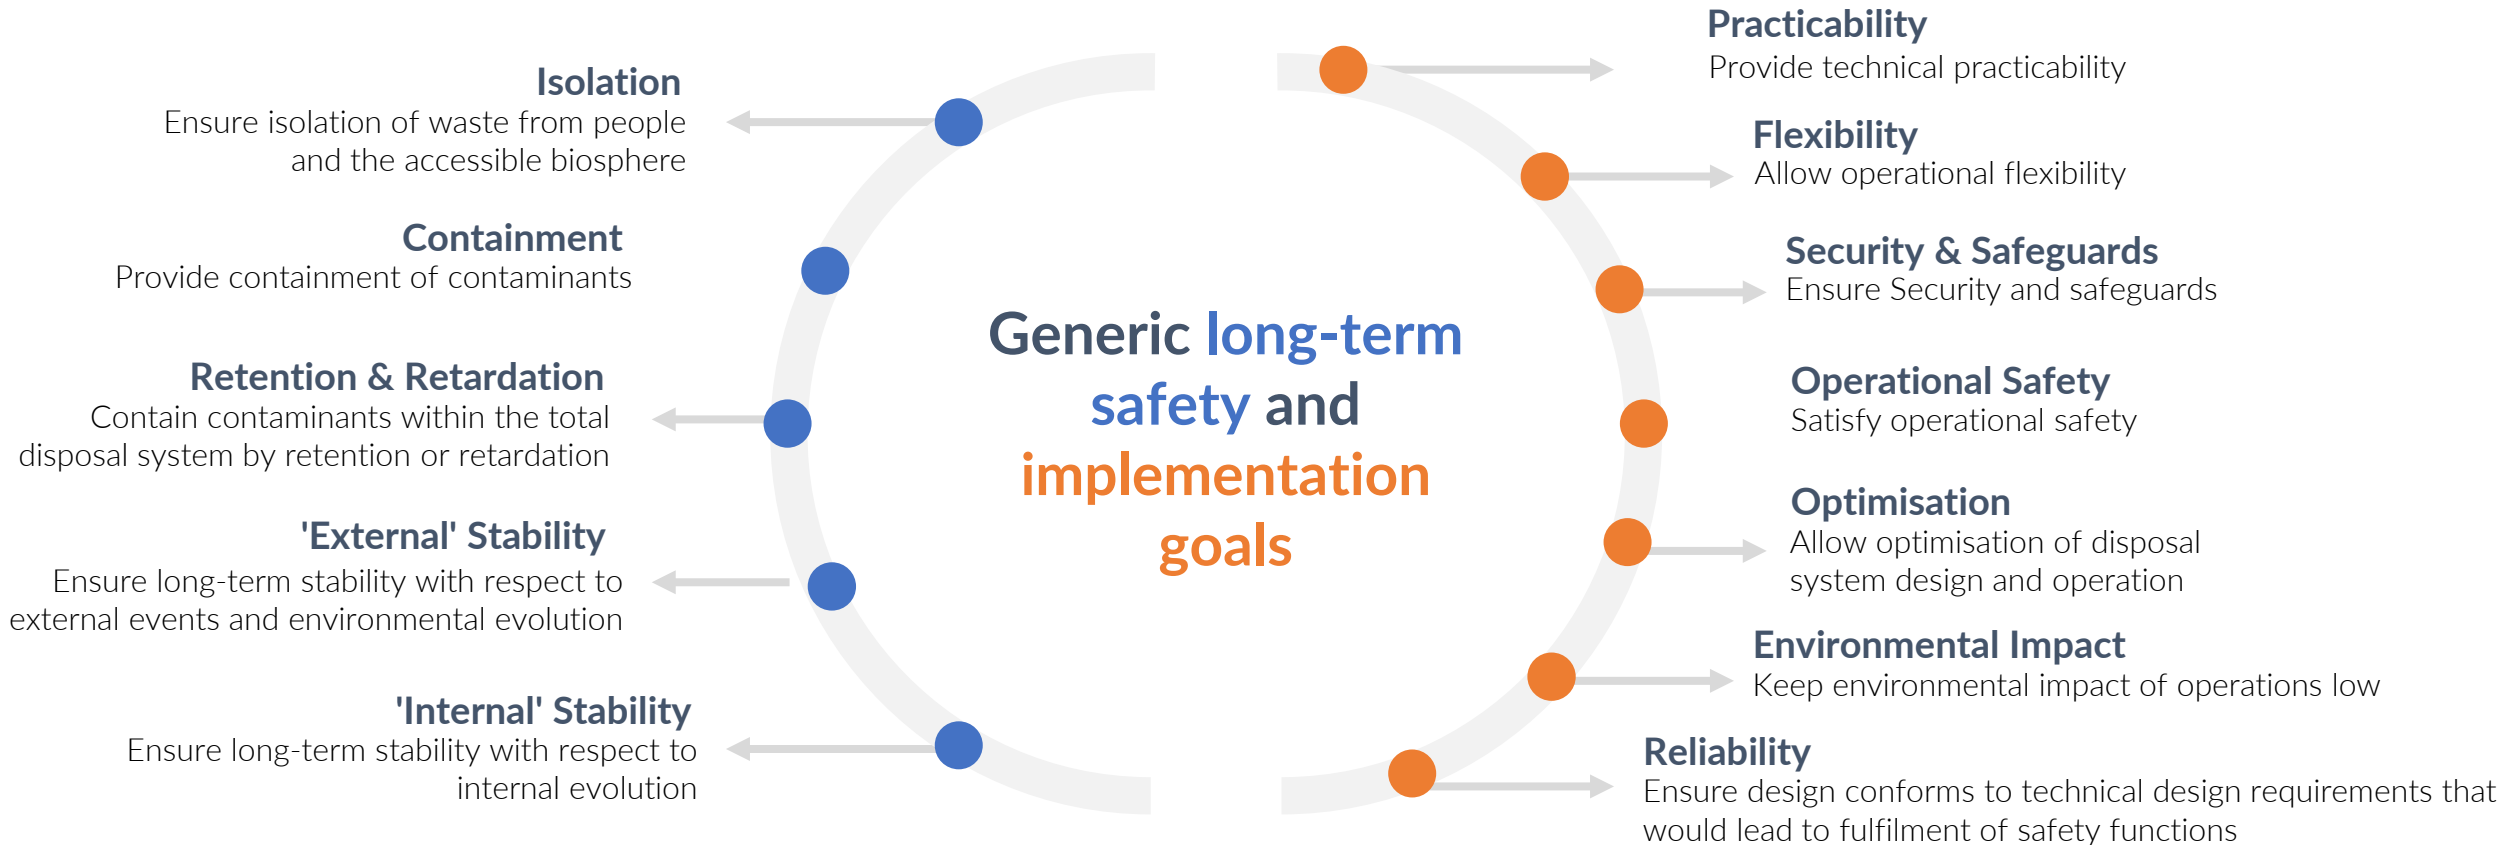

# Knowledge Management: Document hierarchy

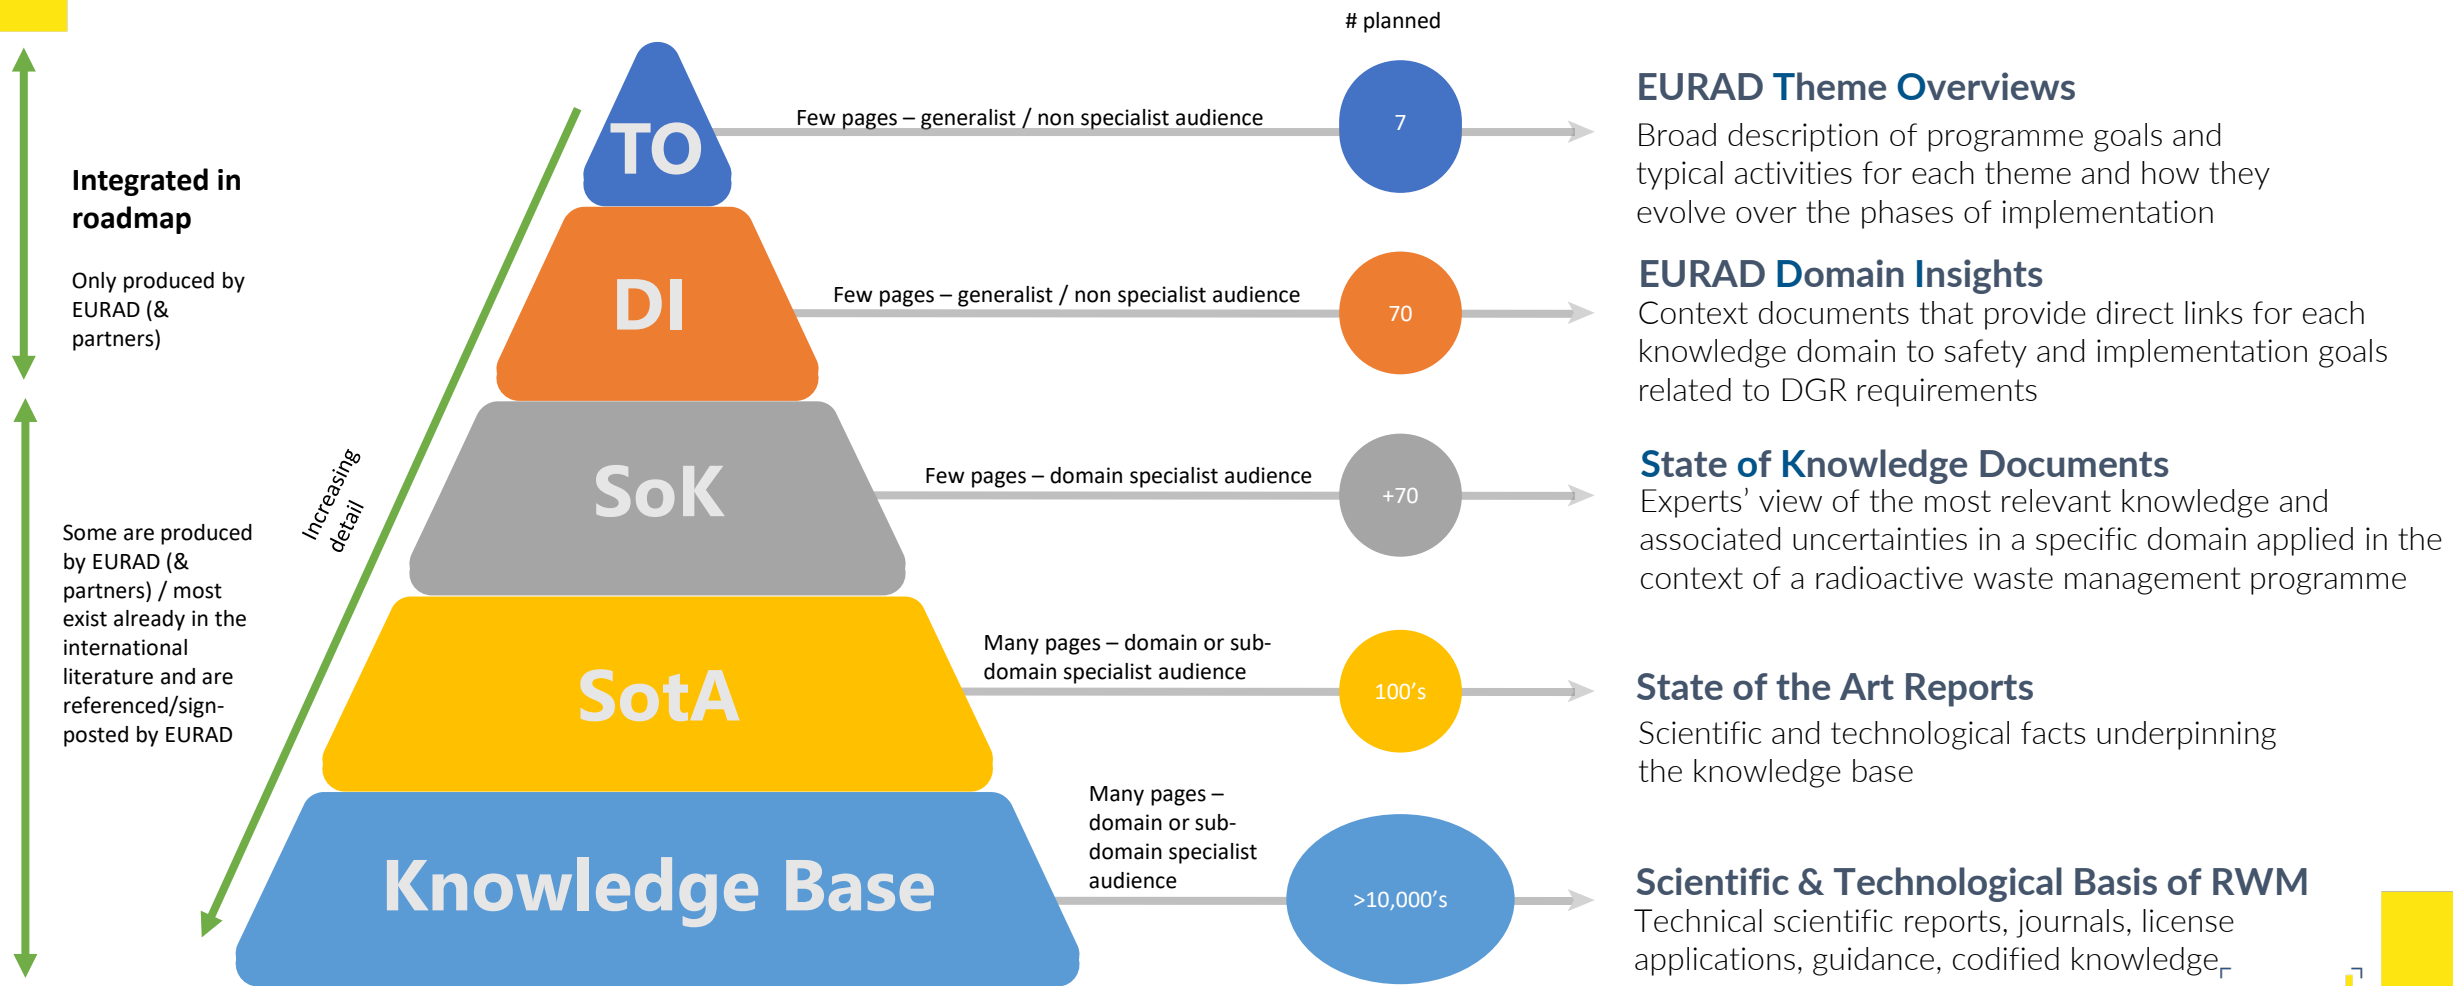

## Example: At the highest level – Theme overviews

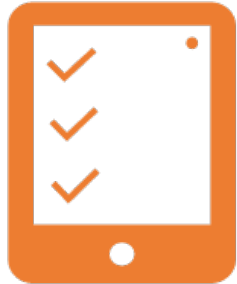

### Typical Activities

Describes generically how activities evolve in each Theme.

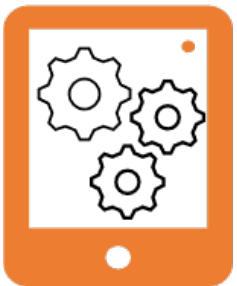

### Capability Needs

Knowledge, skills, laboratories, equipment, tools, technology, industrial manufacturing + more.

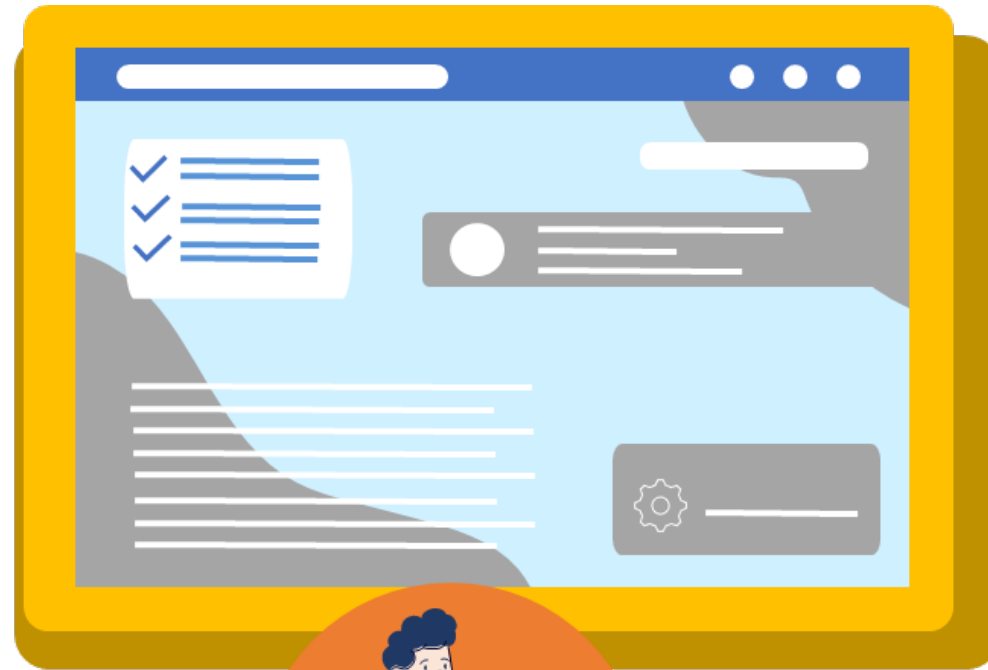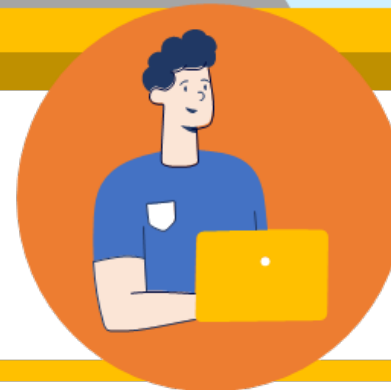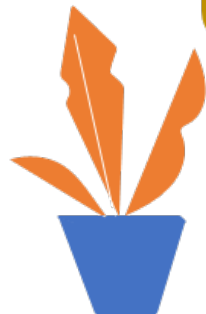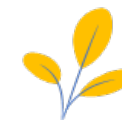

# Roadmap End Users

Supporting knowledge capture and transfer between generations and programmes

## Next Generations

- **New entrants** to the field / entering a specific RWM domain

## Advanced Programmes

- Advanced programmes where **generation changes** might imply that tacit knowledge may be lost

## EURAD & International Scientific Community

- **EURAD** to **prioritise its work**
- **Scientific community**, wanting to identify **future research needs**
- **Anyone** working in RWM to provide a window into the **state of progress of implementing RWM**

Users

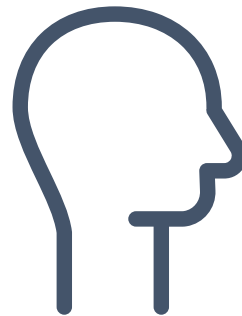

## Early-Stage Programmes

- Early-stage programmes wishing to **roadmap their own programme** using insight from advanced programmes

# Signposting of expert knowledge

Roadmap content will be dated, with an expert perspective at a point in time

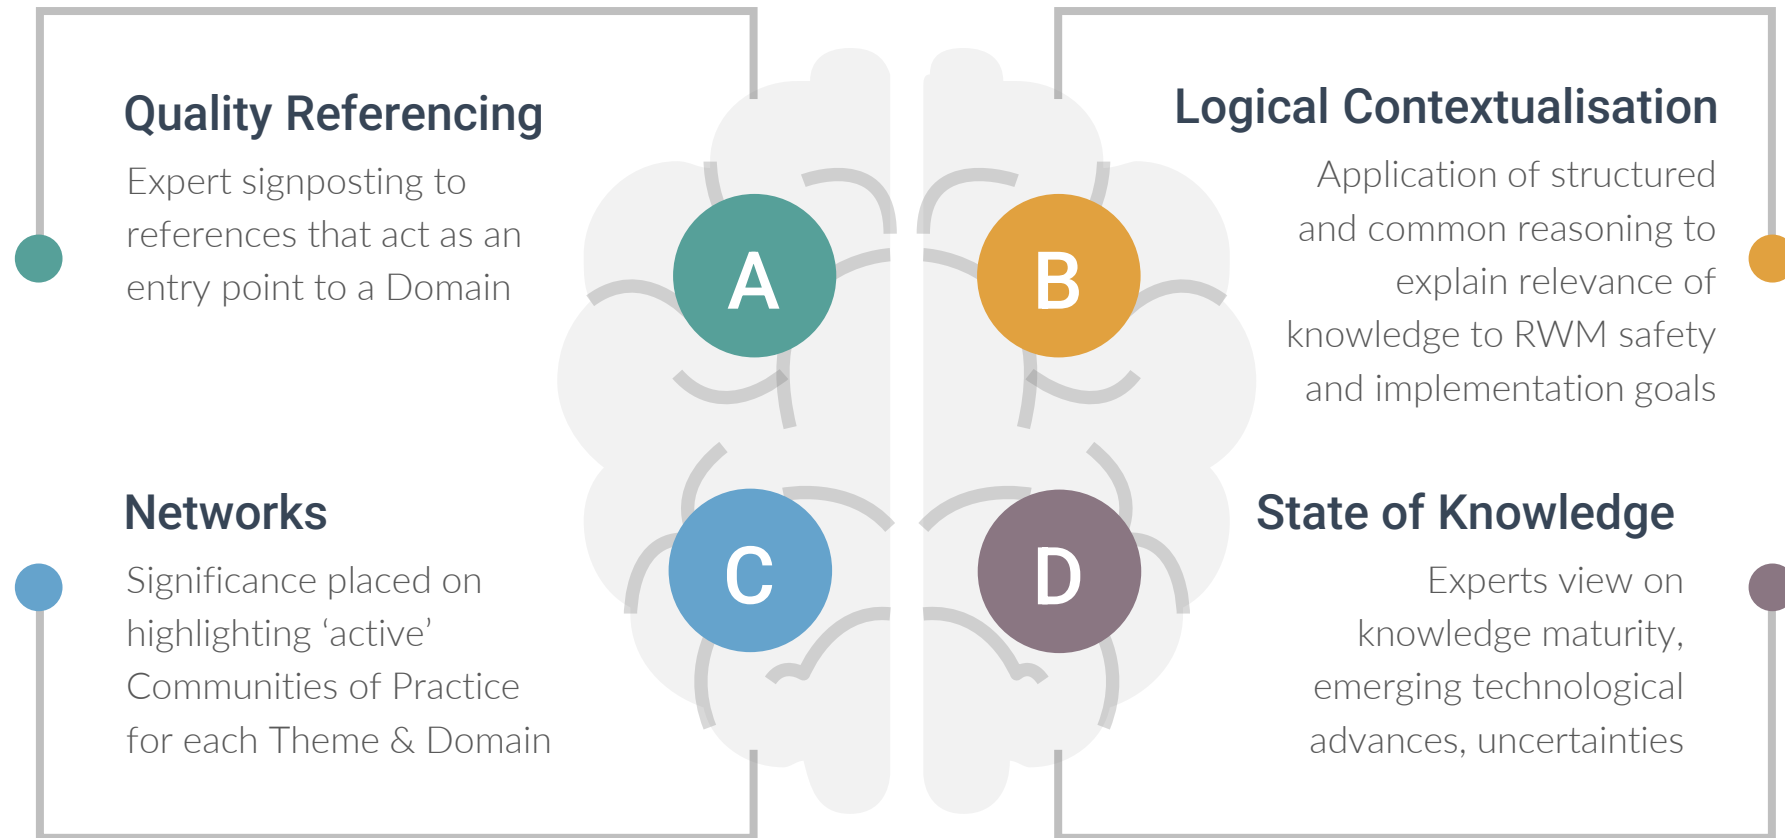



# Role of experts – structuring & codifying the EURAD 'hive mind'

Roadmap content will be authored & reviewed by recognised Domain Experts

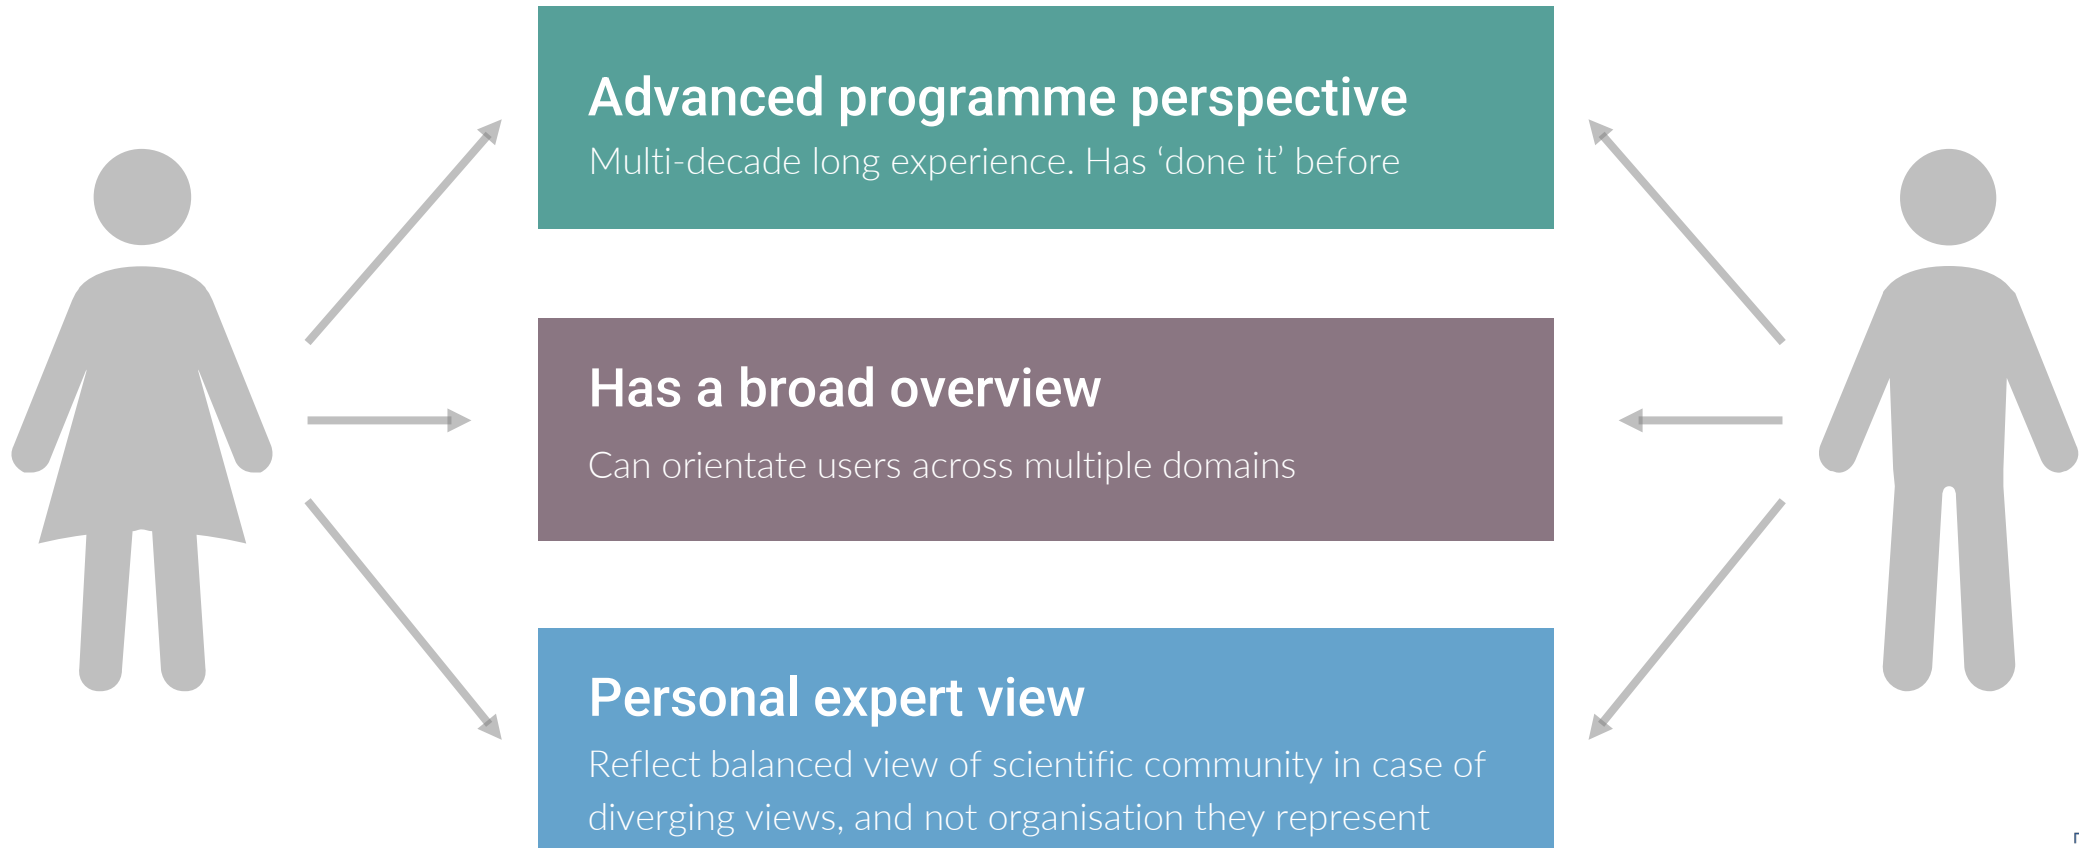

## Concluding remarks

- EURAD provides a **novel framework** in Europe to **cooperate and interaction on science & technology** for radioactive waste management
- Besides RD+D work packages and strategic studies, **knowledge management (including networking) is a key activity** of EURAD
- We strongly encourage you to **look at the EURAD homepage** (<https://www.ejp-eurad.eu>) to **get informed** in detail **about EURAD**
- For **Knowledge Management**, we look forward to **interact with you** as ...
  - **End-user**: have a look and provide feed-back!
  - **Knowledge owner & provider**: support the population of the roadmap with additional information (contact EURAD) and participate in networking
  - **Reviewer**: review some of the knowledge management documents

# Thank you for your attention !

<https://www.ejp-eurad.eu>

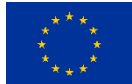

*This project has received funding from the European Union's Horizon 2020 research and innovation programme 2014-2018 under grant agreement N°847593*



**Questions? Comments?**
